# Supplementary material
Source: publisher figshare collection journal article supplement (https://springernature.figshare.com/ndownloader/files/22645727)
Supplement: Supplementary file 1 [file 22645727]

## Sheet: Sheet1
Trial from which the data were derived	Dataset name	Format of dataset	How the dataset can be accessed
POETIC case-control study	POETIC ER_PgR_Ki67 for NeoET.xlsx	.xlsx	On reasonable request by contacting mitch.dowsett@icr.ac.uk
PALLET	PALLET ER_PgR_Ki67 for NeoETxlxs	.xlsx	On reasonable request by contacting mitch.dowsett@icr.ac.uk
IL1839/223	IL1839 223 ER_PgR_Ki67 tum size.xlxs	.xlsx	On reasonable request by contacting mitch.dowsett@icr.ac.uk
ADAPT	WSG_ADAPT_Covid19PandemicDataSupport20200505.xlsx	.xlsx	On reasonable request by contacting mitch.dowsett@icr.ac.uk
Z1031B	Z1031B_ki67.sas	.sas	Available by contacting the ALLIANCE Operations office and completing Data Share request form (see Data access section)
ALTERNATE	n/a (The only information from the ALTERNATE trial, was related to the clinical progression seen in the 1299 patients. There were no biomarker data available)	n/a	n/a
